# Supplementary material
Source: Royal Society of Chemistry journal article supplement (doi:10.1039/d6nh00126b)
Supplement: d6nh00126b1.pdf [file d6nh00126b1.pdf]

## Supporting Information

### **An Acoustic Sensing Fabric based on PVDF-HFP Nanofiber Core-Shell Yarns for Respiratory Acoustic Signal Monitoring**

Jinjin Song,<sup>a</sup> Haifan Tang,<sup>a</sup> Junyun Zhang,<sup>a</sup> Jiaxue Yu,<sup>a</sup> Dailin Yuan,<sup>a</sup> Yanqiu Zhang,<sup>a</sup> Jinyang Wang,<sup>a</sup> Di Pan,<sup>a</sup> Weixu Tian,<sup>a</sup> Jingye Jin,<sup>\*a</sup> Jian Fang<sup>\*b</sup> and Chenhong Lang<sup>\*a</sup>

---

\* Corresponding author.

<sup>a</sup> State Key Laboratory of Bio-based Fiber Materials, College of Textile Science and Engineering (International Institute of Silk), Zhejiang Sci-Tech University, Hangzhou 310018, China. E-mail addresses:

chlang@zstu.edu.cn; jin\_jingye@zstu.edu.cn.

<sup>b</sup> National Engineering Laboratory for Modern Silk, College of Textile and Clothing Engineering, Soochow University, Suzhou 215123, China. E-mail addresses: jian.fang@suda.edu.cn

| Materials                     | Device type  | Working mechanism | Device size (cm <sup>2</sup> ) | Output voltage (V) | Frequency response range (Hz) | Maximum sensitivity (mV Pa <sup>-1</sup> ) | Refs      |
|-------------------------------|--------------|-------------------|--------------------------------|--------------------|-------------------------------|--------------------------------------------|-----------|
| PVDF                          | Fiber-based  | Piezo-Tribo       | 2.5 × 2.5                      | 70.9               | 10-500                        | 10050.6                                    | 1         |
| PVDF/BN                       | Fiber-based  | Piezo-Tribo       | 3 × 4                          | 174.2              | 230-5000                      | 15500                                      | 2         |
| PVDF-TrFE /MXene              | Fiber-based  | Piezo-Tribo       | 4 × 4                          | 42.3               | 50-1000                       | 37000                                      | 3         |
| PVDF/MOF                      | Fiber-based  | Piezo             | 4 × 4                          | 6                  | 20-330                        | 950                                        | 4         |
| PAN, PA6                      | Fiber-based  | Tribo             | 19.6                           | 0.612              | 20-5000                       | 715                                        | 5         |
| PVDF/rGO                      | Yarn-based   | Piezo             | 1 cm (length)                  | 0.0075             | 50-1000                       | 6.22                                       | 6         |
| PVDF-TrFE /BaTiO <sub>3</sub> | Fabric-based | Piezo             | 8 × 8                          | 0.002              | 80-1000                       | 19.6                                       | 7         |
| PMMA, PTFE                    | Fabric-based | Optical           | 24 × 24                        | /                  | 70-320                        | 17.48                                      | 8         |
| PVDF-HFP                      | Fabric-based | Piezo-Tribo       | 2 × 2                          | 38.3               | 170-1010                      | 2500                                       | this work |

**Table. S1 Comparison of the performance of all-fiber acoustic sensors.**

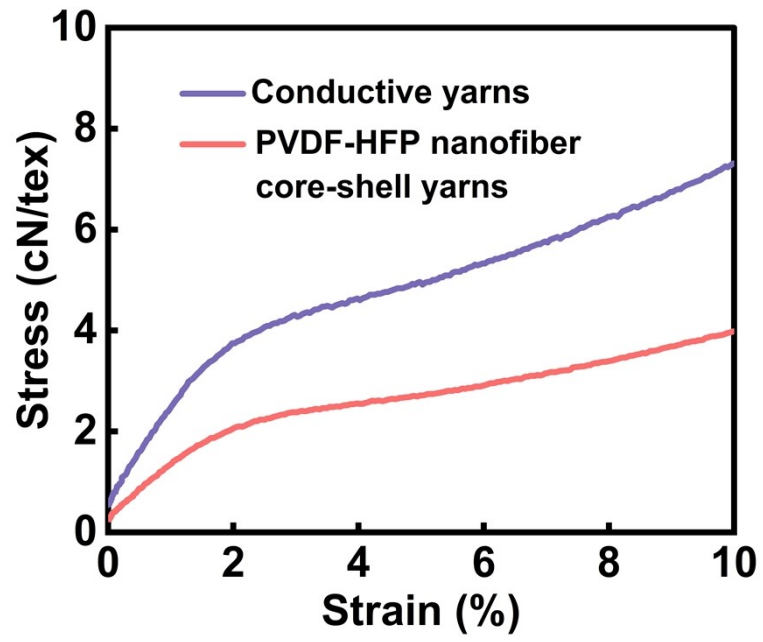

**Fig. S1:** Stress-strain curves of conductive yarns and PVDF-HFP core-shell yarns.

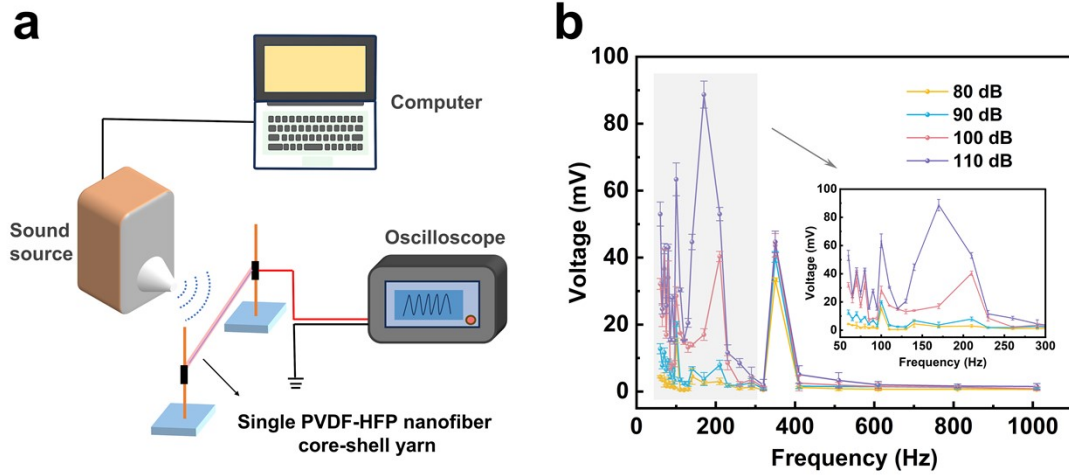

**Fig. S2:** (a) Schematic illustration of the setup for single PVDF-HFP nanofiber yarn, (b) Dependence of voltage outputs on sound frequency at four different sound pressure levels for single PVDF-HFP nanofiber core-shell yarn.

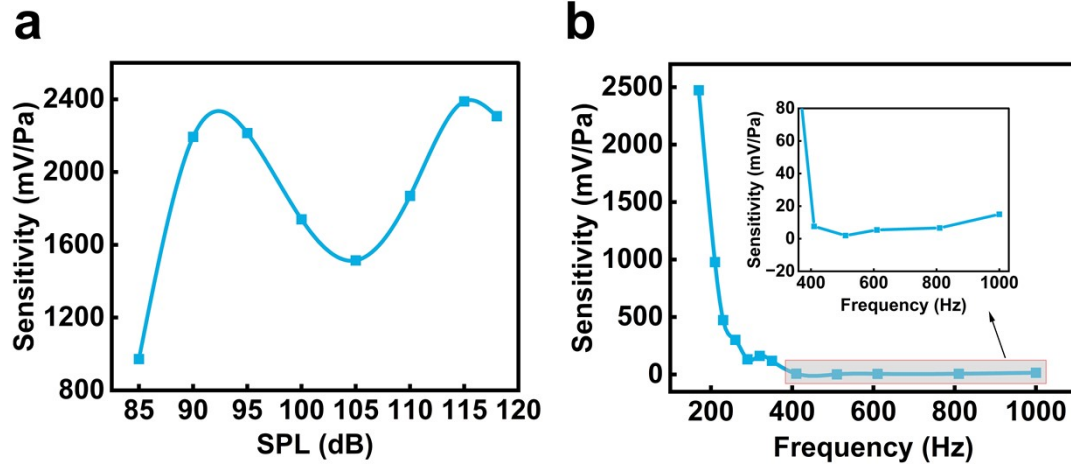

**Fig. S3:** The sensitivity profile of ASF (a) across the 85-118 dB sound pressure range (frequency, 170 Hz) and (b) across the 170-1000 Hz sound frequency range (sound pressure level, 94 dB).

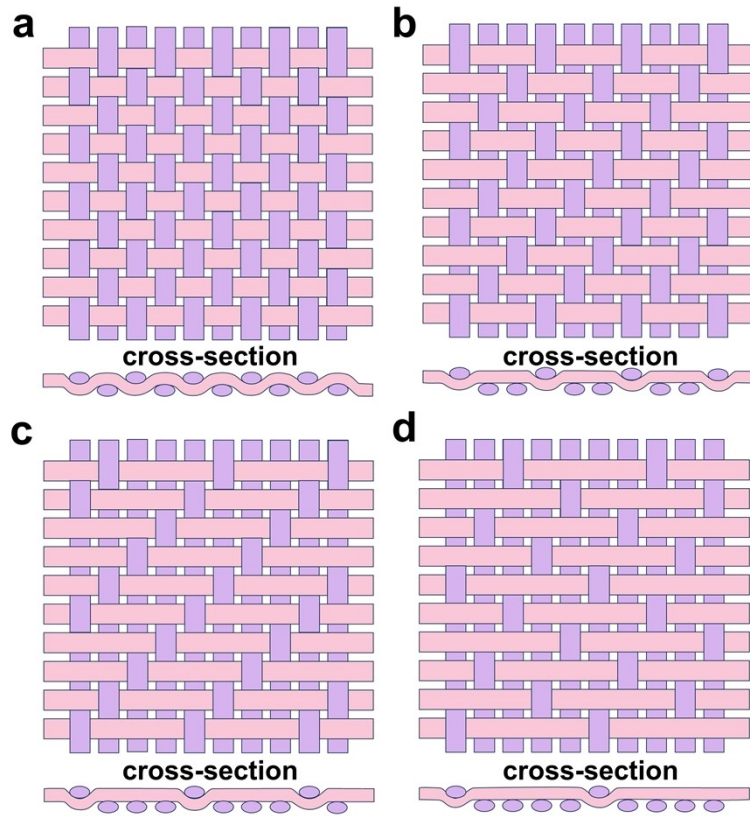

**Fig. S4:** The schematic diagrams of the fabric structure (a) plain weave, (b) 1/2 twill weave, (c) 1/3 twill weave, and (d) sateen weave.

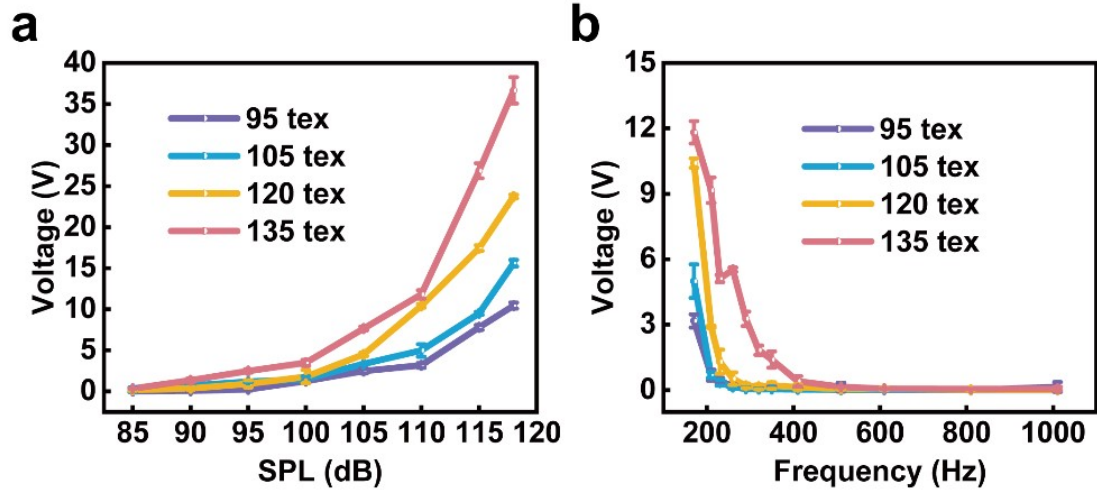

**Fig. S5:** Influence of weft fineness on (a) sound pressure response properties (frequency, 170 Hz) and (b) frequency response properties (SPL, 110 dB) of ASF.

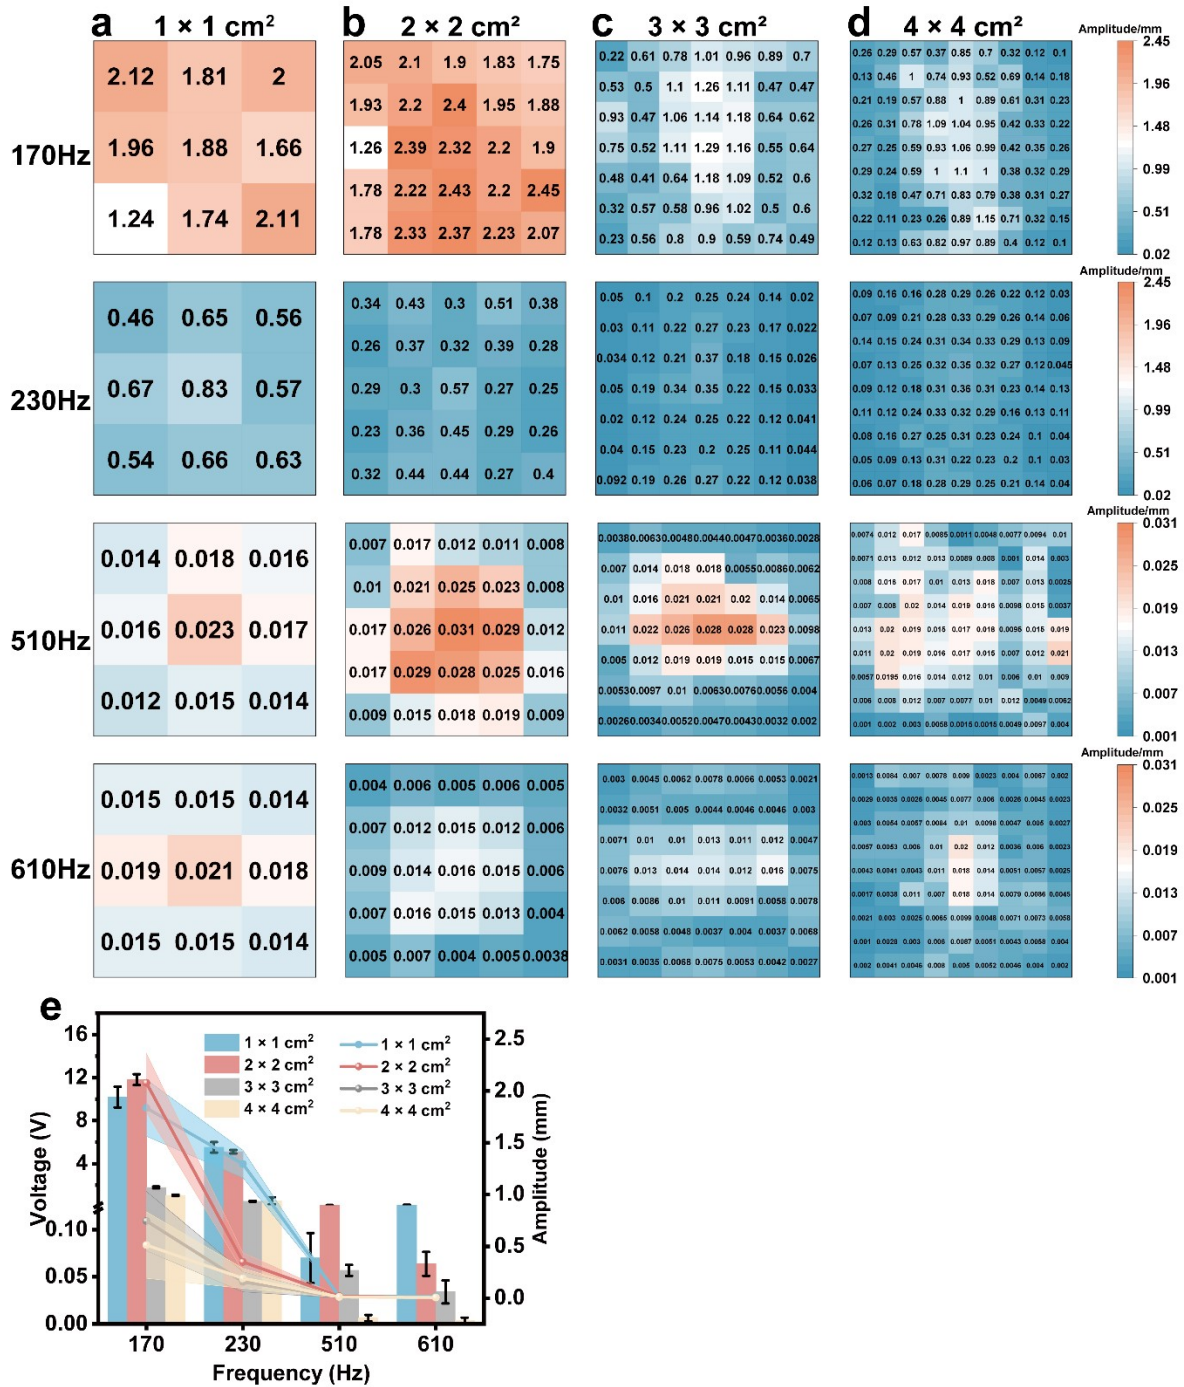

**Fig. S6:** Vibration testing results of ASF with different sizes. (a)  $1 \times 1 \text{ cm}^2$ , (b)  $2 \times 2 \text{ cm}^2$ , (c)  $3 \times 3 \text{ cm}^2$ , and (d)  $4 \times 4 \text{ cm}^2$ , (e) Comparison chart of vibration conditions and corresponding output voltages for ASFs of four different sizes.

**a**

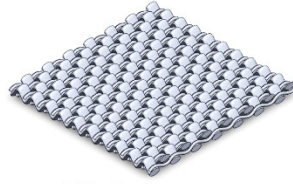

**Plain weave**

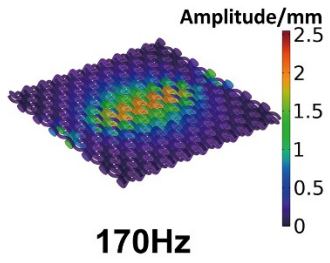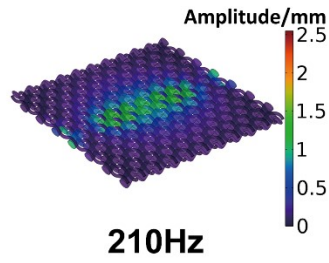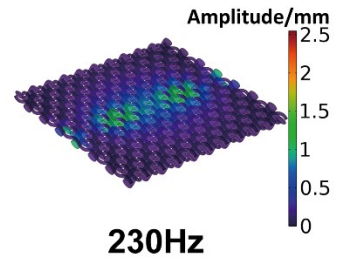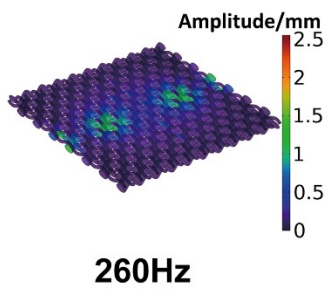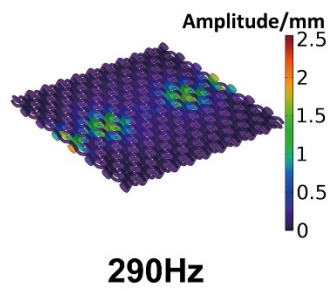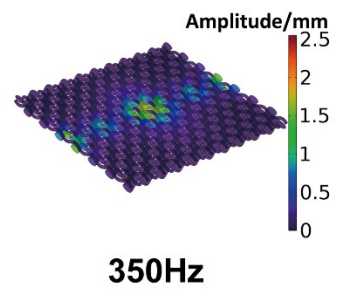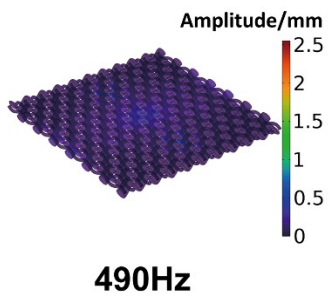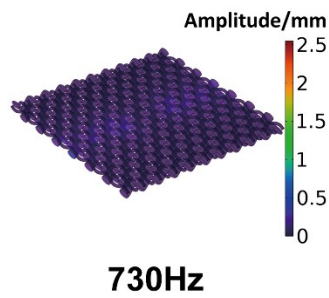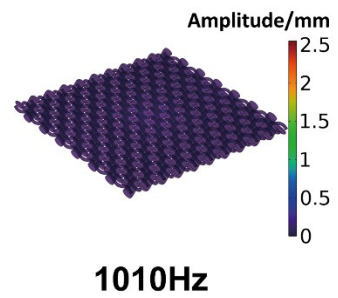

**b**

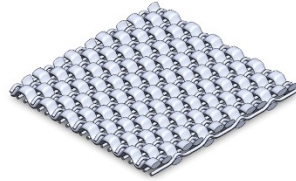

**1/2 Twill weave**

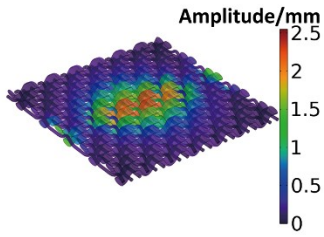

**170Hz**

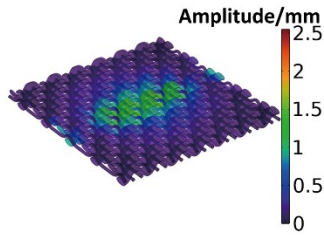

**210Hz**

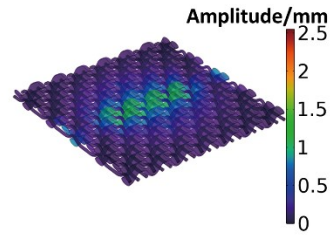

**230Hz**

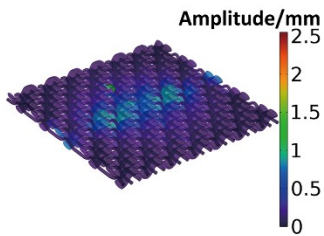

**260Hz**

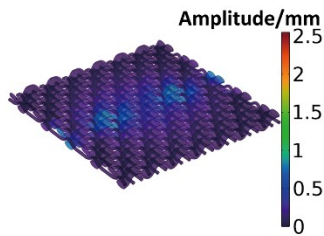

**290Hz**

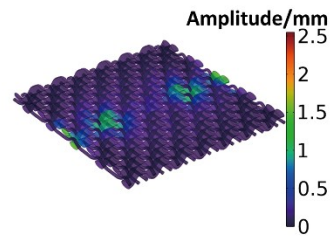

**350Hz**

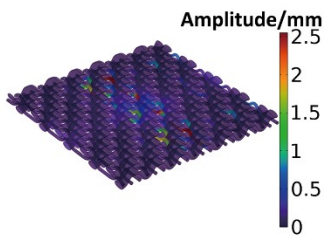

**490Hz**

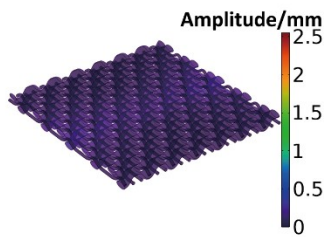

**730Hz**

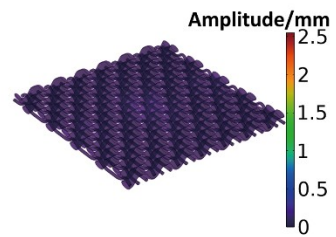

**1010Hz**

**C**

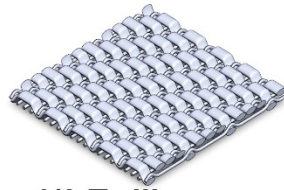

**1/3 Twill weave**

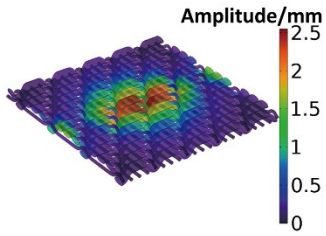

**170Hz**

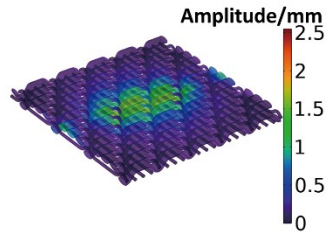

**210Hz**

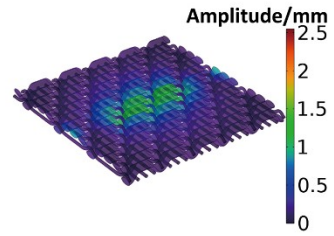

**230Hz**

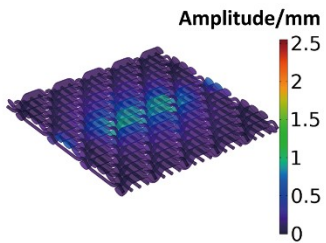

**260Hz**

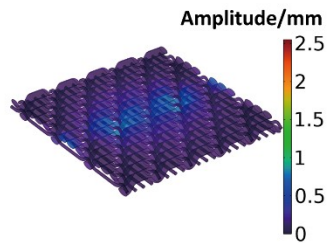

**290Hz**

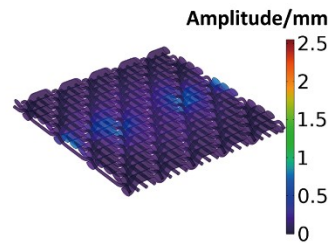

**350Hz**

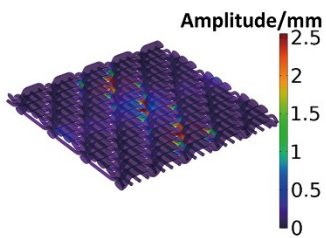

**490Hz**

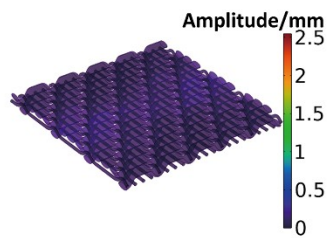

**730Hz**

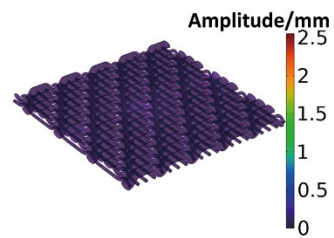

**1010Hz**

**d**

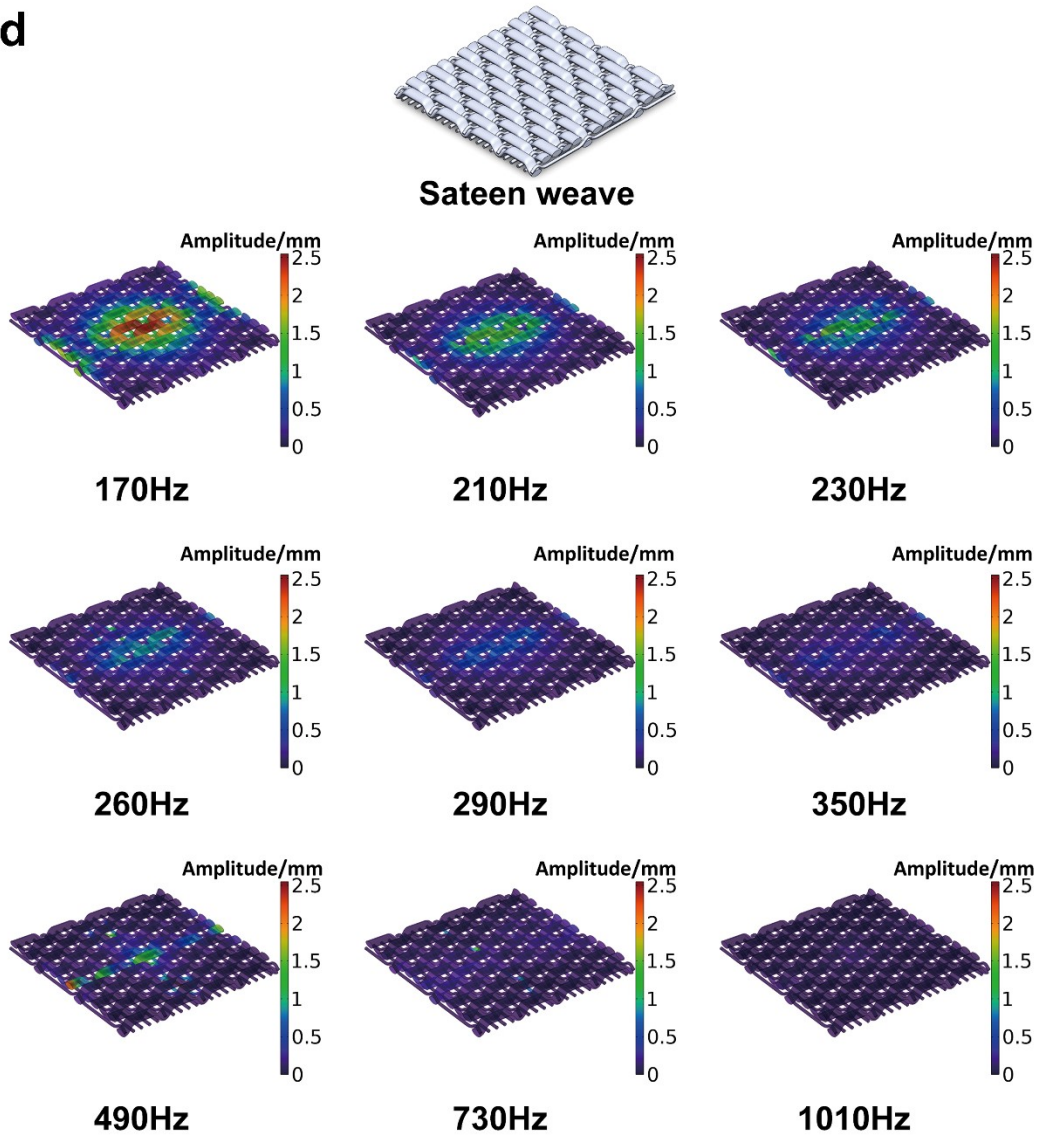

**Fig. S7:** Simulation test results for different fabric weaves. (a) plain weave, (b) 1/2 twill weave, (c) 1/3 twill weave, and (d) sateen weave.

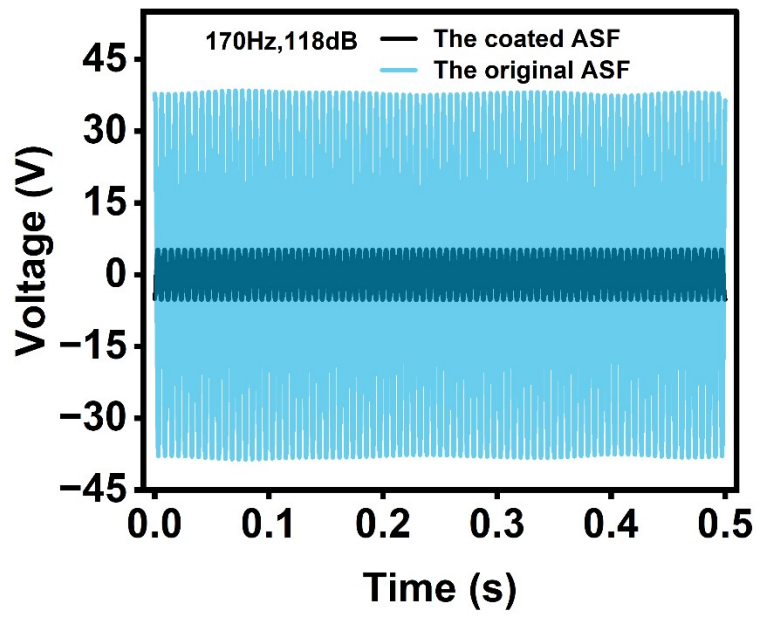

**Fig. S8:** The output voltage plot of the coated ASF and original ASF.

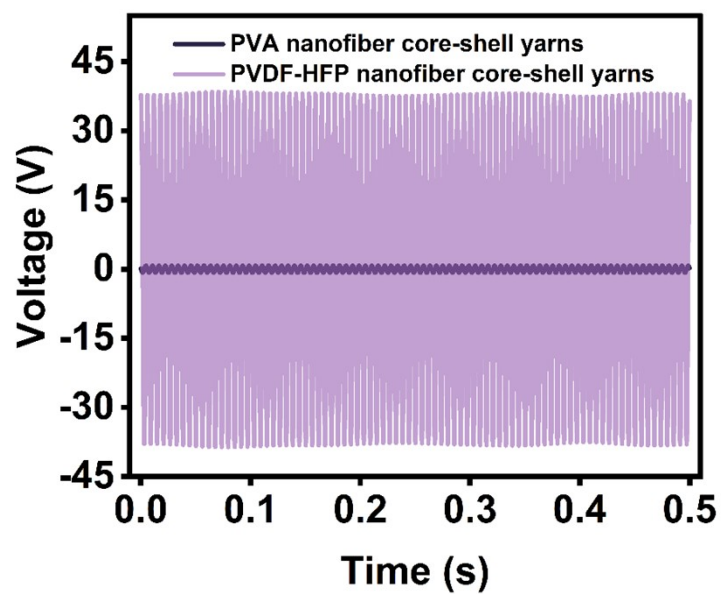

**Fig. S9:** Electrical output plot measured using PVA nanofiber core-shell yarns and P(VDF-HFP) nanofiber core-shell yarns as weft yarns, respectively.

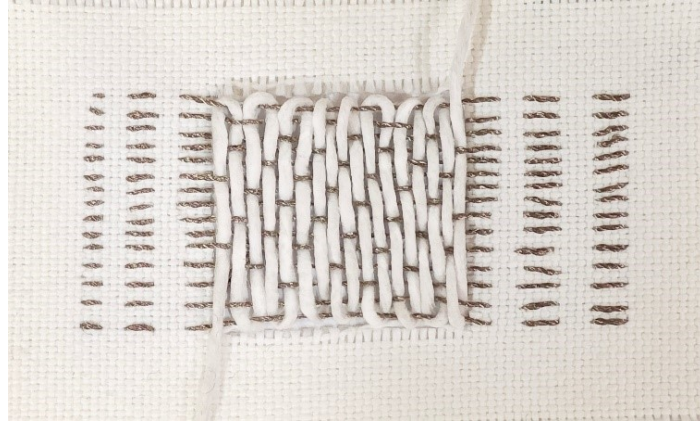

**Fig. S10:** The digital image of the integration of ASF with conventional textiles

**a**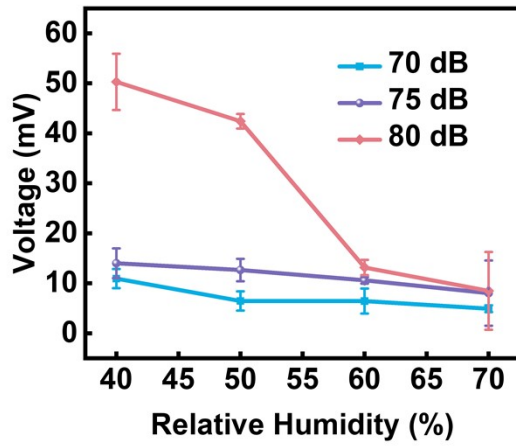**b**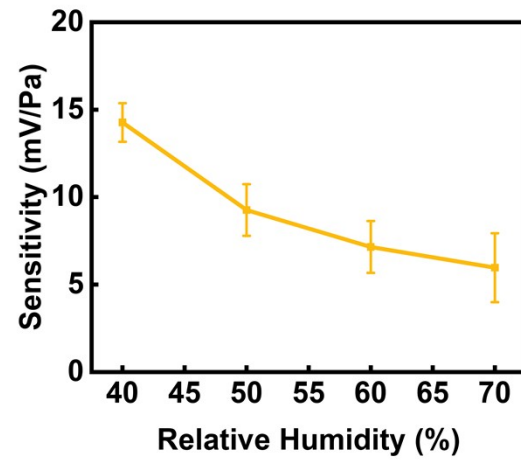

**Fig. S11:** (a) Output voltage of ASF under different humidity conditions (70-85 dB/170Hz), (b) Sensitivity of ASF under different humidity conditions (94 dB/1000 Hz).

## References

- 1 M.O.G. Nayeem, S. Lee , H. Jin , N. Matsuhisa, H. Jinno, A. Miyamoto , T. Yokota, T. Someya, *Langmuir*, 2020, **117**, 7063-7070.
- 2 H. Shao, Q.R. Cai, H.B. Jiang, R.U.R. Sagar, S. Mateti, G. Sathikumar, B.Z. Yu, S.M. Huang, Y.L. Chen, *Nano Energy*, 2024, **121**, 109195.
- 3 F. Mokhtari, K. A. S. Usman, J.Z. Zhang, R. Komljenovic, Ž. Simon, B. Dharmasiri, A. Rezk, P.C. Sherrell, L.C. Henderson, R.J. Varley, J.M. Razal, *ACS Appl. Mater. Interfaces*, 2025, **17**, 3214-3228.
- 4 K. Roy, S. Jana, Z. Mallick, S.K. Ghosh, B. Dutta, S. Sarkar, C. Sinha, D. Mandal, *Langmuir*, 2021, **37**, 7107-7117.
- 5 Y. Jiang, Y.F. Zhang, C. Ning, Q.Q. Ji, X. Peng, K. Dong, Z.L. Wang, *Small*, 2022, **18**, 202106960.
- 6 F. Mokhtari , S. Danti , B. Azimi, F. Hellies, E. Zanoletti, G. Albertin, L. Astolfi, R. J. Varley , J. M. Razal, *Energy Environ. Mater.*, 2025, **8**, e12807.
- 7 W. Yan, G. Noel, G. Loke, E. Meiklejohn, T. Khudiyev, J. Marion, G.C. Rui, J. Lin, J. Cherston, A. Sahasrabudhe, J. Wilbert, I. Wicaksono, R.W. Hoyt, A. Missakian, L. Zhu, C. Ma, J. Joannopoulos, Y. Fink, *Nature*, 2022, **603**, 616-623.
- 8 M.L. Zhang, H.Y. Su, C. Zhang, X.Y. Wen, *Measurement*, 2025, **242**, 116044.
